# Supplementary material for: Ecological Traits and Trophic Plasticity in the Greater Pipefish <em>Syngnathus acus</em> in NW Iberian Peninsula
Source: Preprints.org preprint supplement (doi:10.20944/preprints202203.0412.v1), 2022-03-31
Supplement: Supplementary file 1 [file supplementary]

## SUPPLEMENTARY MATERIAL

### Ecological traits and trophic plasticity in the greater pipefish *Syngnathus acus* in NW Iberian Peninsula

Miquel Planas<sup>1\*</sup>

<sup>1</sup> Department of Ecology and Marine Resources, Instituto de Investigaciones Marinas (CSIC), 36208 Vigo, Spain

\* Corresponding author: [mplanas@iim.csic.es](mailto:mplanas@iim.csic.es)

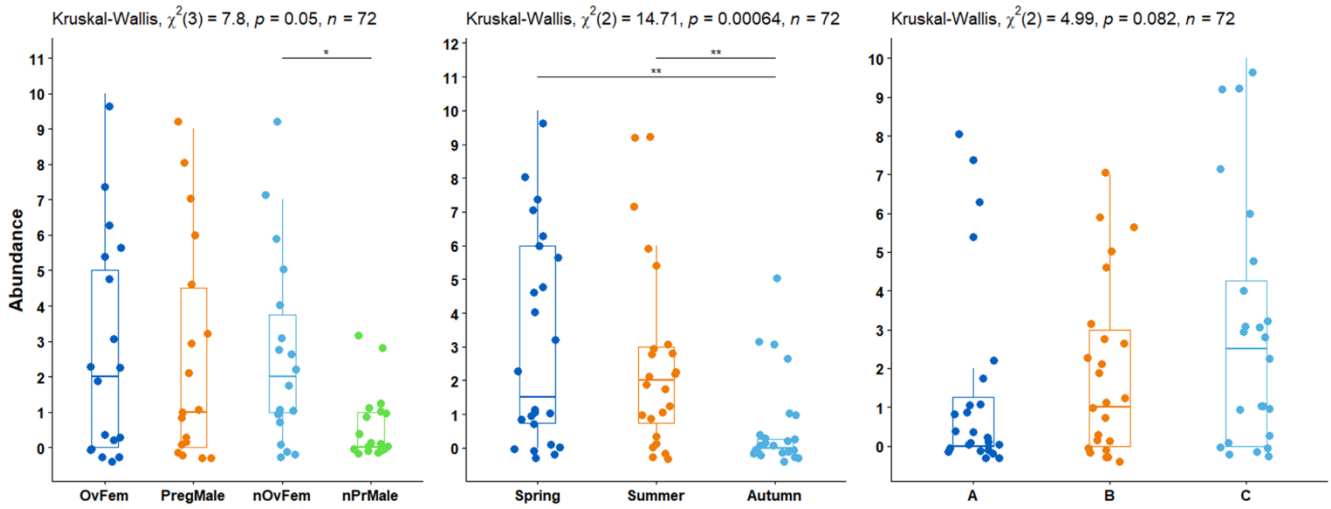

**Figure S1.** Abundances in *Syngnathus acus* collected in Cíes Archipelago (2017-2018) considering reproductive states (ovigerous females, pregnant males, nonovigerous females and non-pregnant males), seasons (spring, summer and autumn) and sites (A, B and C). Significances of Kruskal-Wallis test are shown.

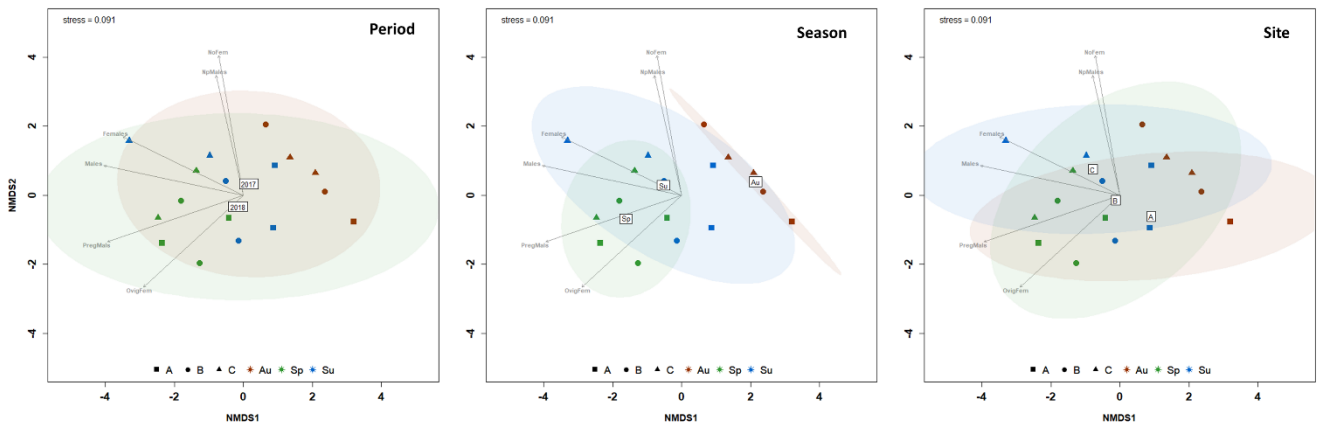

**Figure S2.** Two-dimensional non-metric multidimensional scaling (NMDS; Bray–Curtis similarities) plot for *Syngnathus acus* individuals collected in Cíes Archipelago considering period (years 2017 and 2018), seasons (spring, summer and autumn) and sites (A, B and C). The confidence limits for ellipses (95% confidence) are shown. The influence of reproductive states (ovigerous females, pregnant males, nonovigerous females and non-pregnant males) are indicated by arrows. Each mark corresponds to mean values for duplicate samples.

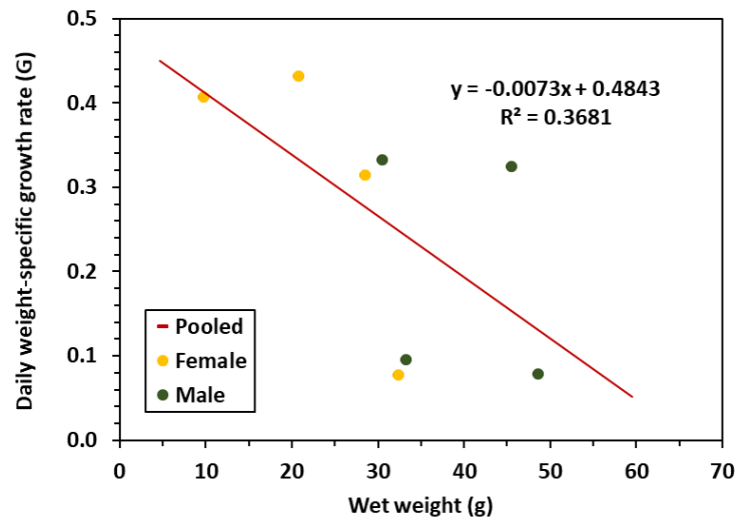

**Figure S3.** Relationship between wet weight and daily weight-specific growth rate in *Syngnathus acus* collected in Cíes Archipelago. Only recaptured individuals are included.

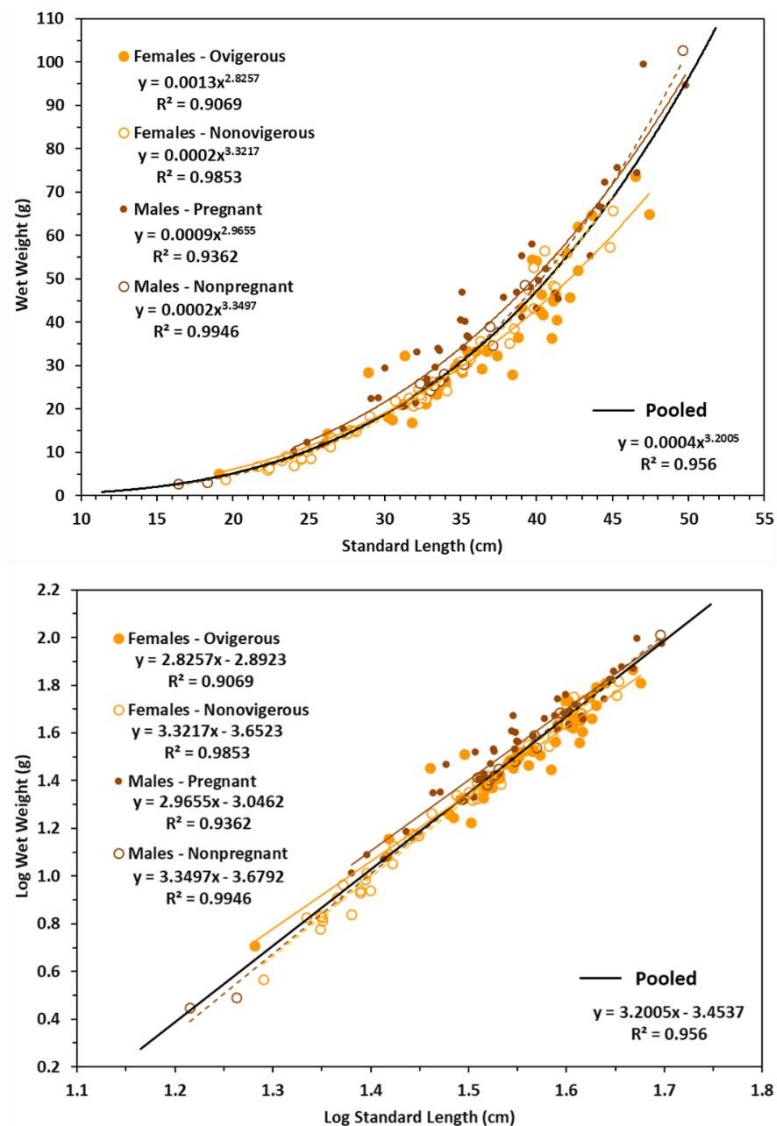

**Figure S4.** Length-weight relationships in mature (continuous line) and immature (dotted line) *Syngnathus acus* males and females captured in surveys carried out in spring, summer and autumn (2017 and 2018) on sites A, B and C in Cíes Archipelago.

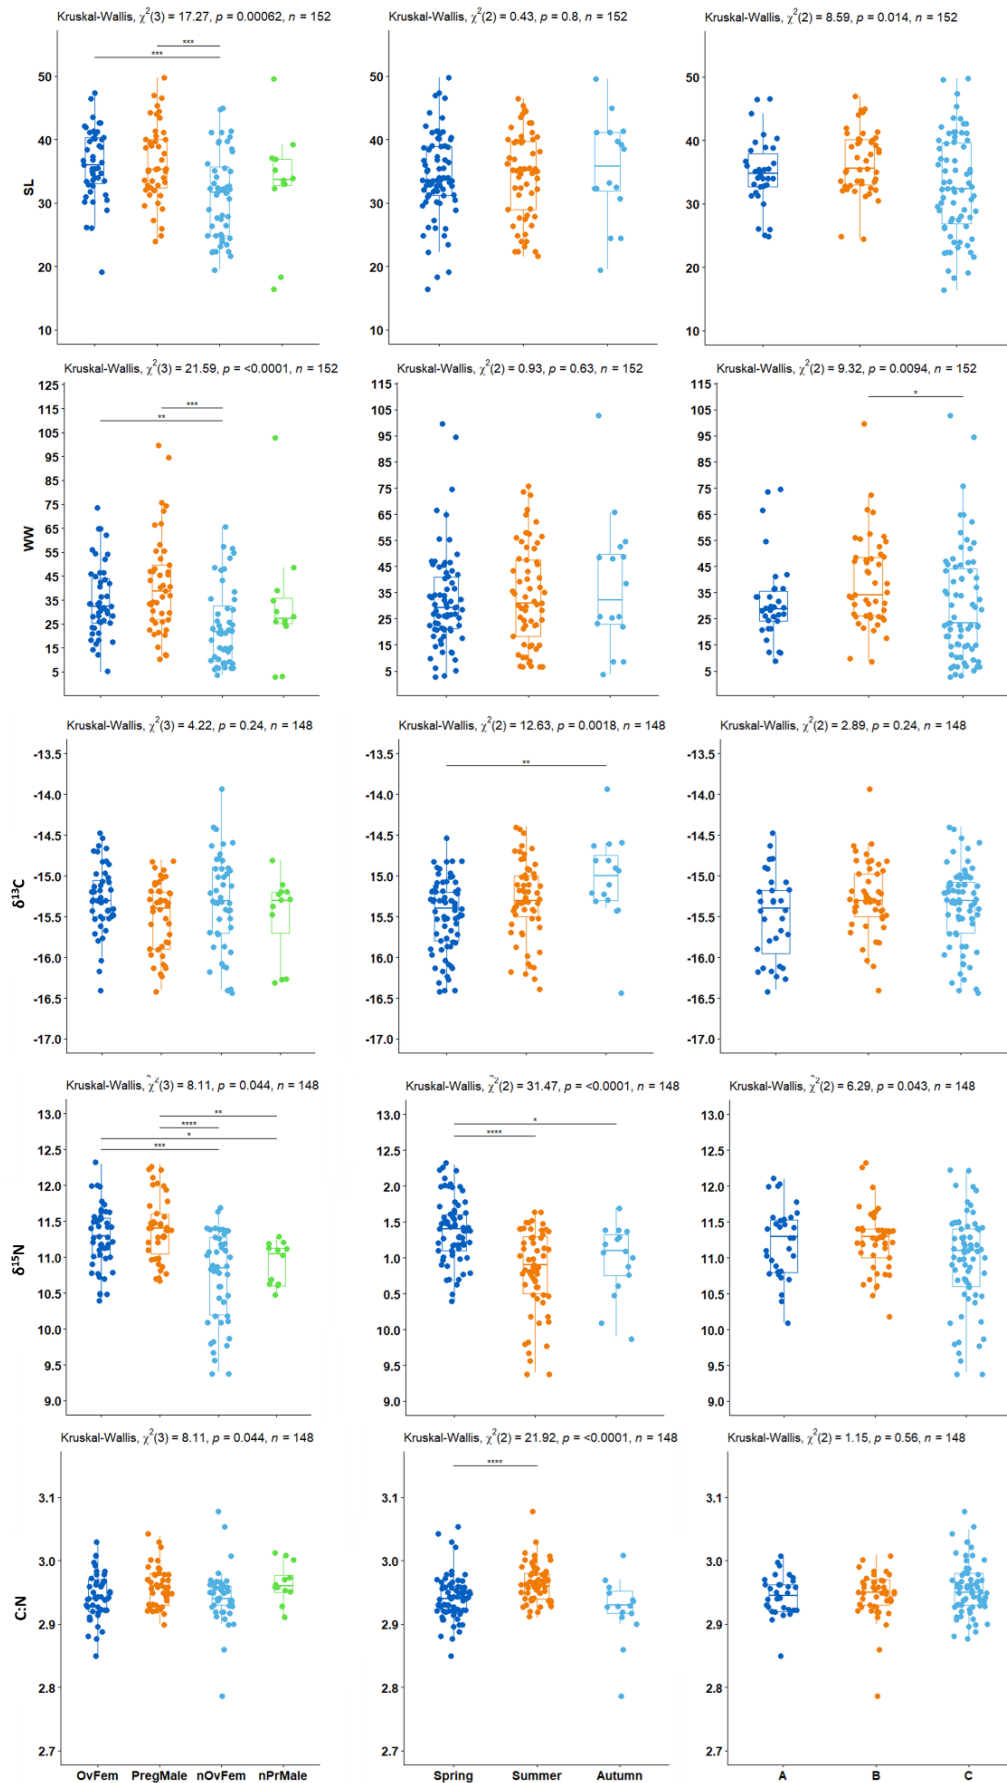

**Figure S5.** SL (cm), WW (g),  $\delta^{13}\text{C}$  (‰),  $\delta^{15}\text{N}$  (‰) and C:N values in *Syngnathus acus* collected in Cíes Archipelago (2017-2018) considering reproductive states (ovigerous females, pregnant males, nonovigerous females and non-pregnant males), seasons (spring, summer and autumn) and sites (A, B and C). Significances of Kruskal-Wallis test are shown.

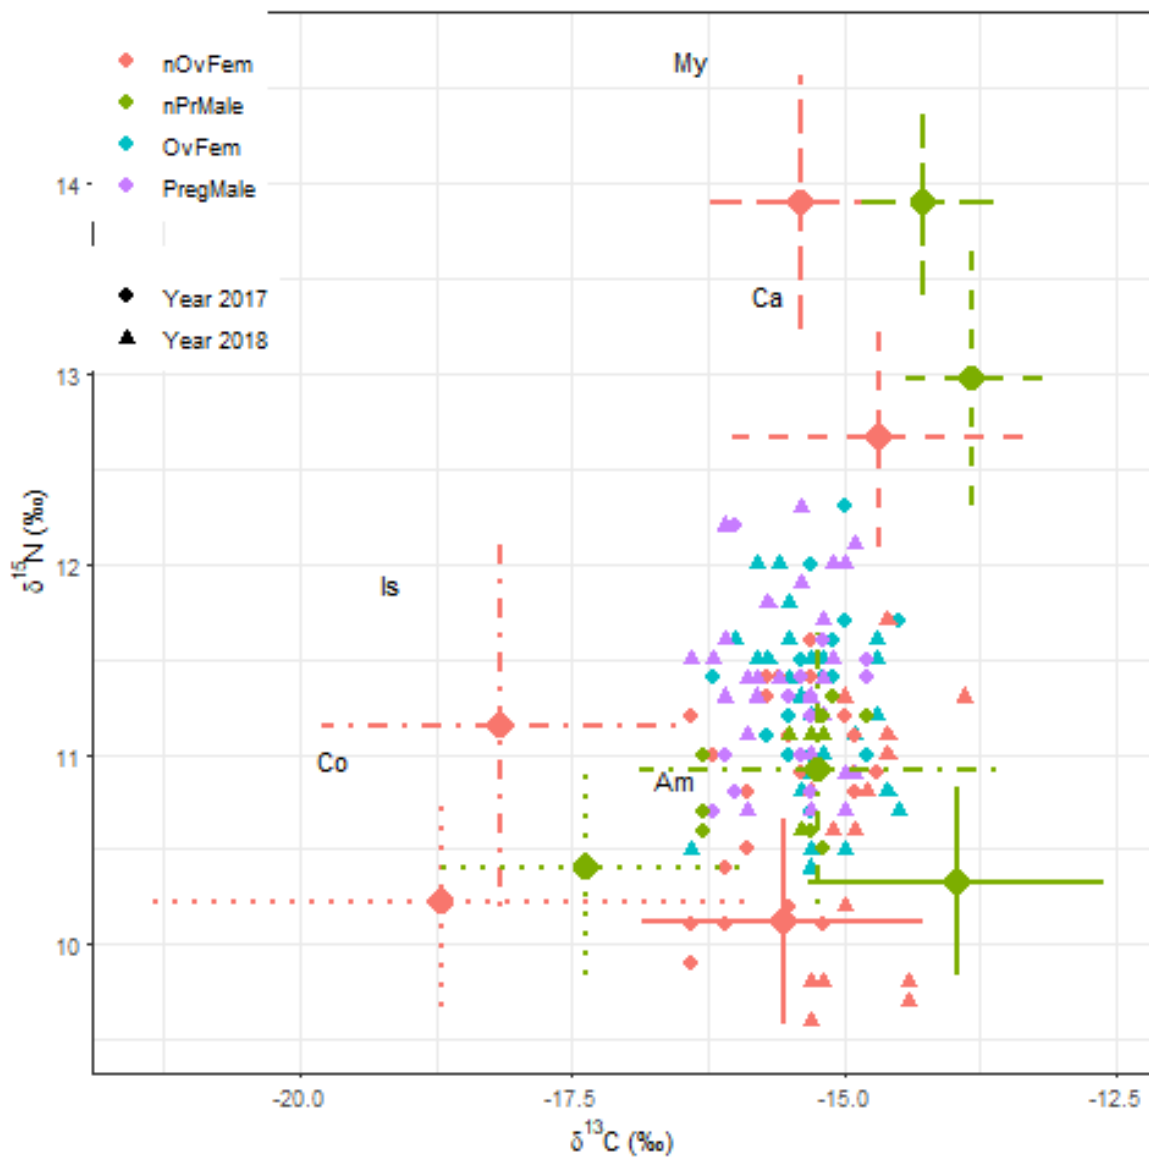

**Figure S6.** Isotopic bi-plot for reproductive stages in *Syngnathus acus* (n=146; 2017 and 2018 surveys) relative to average  $\delta^{13}\text{C}$  and  $\delta^{15}\text{N}$  signatures of five potential prey sources (mean  $\pm$  sd; crosses) adjusted for TDF values and consumers (coloured small symbols). TDF values: 2.5 for  $^{13}\text{C}$  and 3.9 for  $^{15}\text{N}$  [58]. Two consumers with a low probability (<5%) were excluded on both the plot and the subsequent mixing model [65]. Sources: Am - Amphipoda, Co - Copepoda, Ca - Caridea, Is – Isopoda, and My - Mysidacea. Reproductive stages: nOvFem – Nonovigerous female; nPrM – Non-pregnant male; OvFem – Ovigerous female; PregMale – Pregnant male.

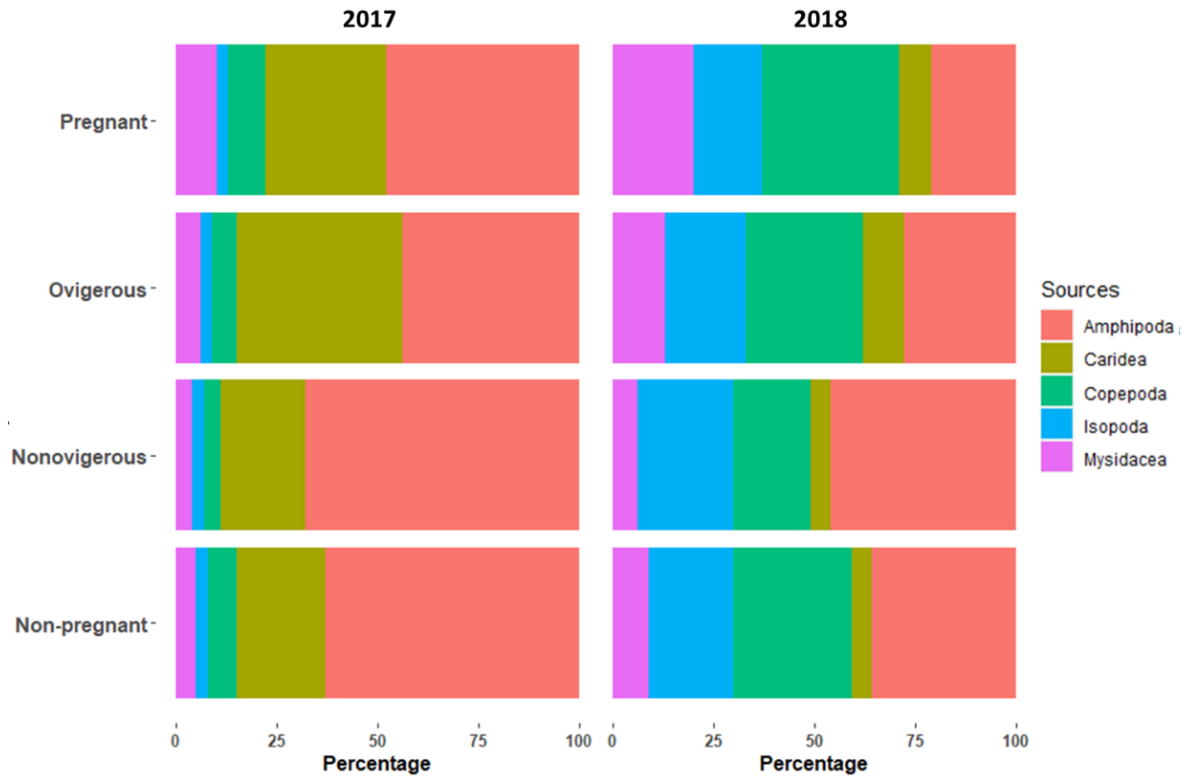

**Figure S7:** Percent (mean  $\pm$  sd) contribution of potential prey sources to *S. acus* diet as estimated by Bayesian Stable Isotope Mixing Model (SIMM) (MixSIAR package in R v. 3.1.12). Analyses based on isotopic data for dorsal fin tissues of 146 fishes sampled on Cíes Archipelago in 2017-2018. Bayesian models run (long run; chain length=300,000, burn=200,000) using experimentally derived TDF values ( $\Delta^{13}\text{C}=2.50\text{‰}$ ;  $\Delta^{15}\text{N}=3.91\text{‰}$ ) (see [58] for further details). Convergence and diagnostic statistics evaluated using Gelman–Rubin and Geweke tests.

Sources: Amphipods: *Amphilochus manudens*, *Apherusa* spp., *Caprella acanthifera*, *C. linearis*, *Corophium* spp., and other gammaridae  
 Caridea: *Hippolyte varians*  
 Copepods: Harpacticoida  
 Isopoda: *Cymodoce truncata*, *Dynamene bidentata*  
 Mysidacea: *Siriella armata*.

**Table S1.** Standard length (cm) and wet weight (g) in *Syngnathus acus* collected in 2017-2018 in Cíes Archipelago. Recaptured specimens are not included.

|               | Standard length (cm) |      |      |     | Wet weight (g)  |       |     |     |
|---------------|----------------------|------|------|-----|-----------------|-------|-----|-----|
|               | Mean $\pm$ sd        | Max  | Min  | n   | Mean $\pm$ sd   | Max   | Min | n   |
| <b>Total</b>  | 34.4 $\pm$ 6.8       | 49.8 | 6.8  | 152 | 33.3 $\pm$ 19.3 | 102.7 | 2.8 | 152 |
| <b>Period</b> |                      |      |      |     |                 |       |     |     |
| <b>2017</b>   | 33.6 $\pm$ 6.9       | 49.6 | 16.4 | 70  | 30.7 $\pm$ 18.6 | 102.7 | 2.8 | 70  |
| <b>2018</b>   | 35.2 $\pm$ 6.6       | 49.8 | 21.6 | 82  | 35.4 $\pm$ 19.7 | 99.6  | 6.0 | 82  |
| <b>Season</b> |                      |      |      |     |                 |       |     |     |
| <b>Spring</b> | 34.3 $\pm$ 6.6       | 49.8 | 16.4 | 75  | 31.9 $\pm$ 18.1 | 99.6  | 2.8 | 75  |
| <b>Summer</b> | 34.4 $\pm$ 6.7       | 46.5 | 21.6 | 61  | 33.8 $\pm$ 19.2 | 75.6  | 6.5 | 61  |
| <b>Autumn</b> | 35.3 $\pm$ 8.1       | 49.6 | 19.5 | 16  | 37.7 $\pm$ 25.3 | 102.7 | 3.7 | 16  |
| <b>Site</b>   |                      |      |      |     |                 |       |     |     |
| <b>A</b>      | 35.0 $\pm$ 5.3       | 46.6 | 24.9 | 34  | 31.5 $\pm$ 15.7 | 74.5  | 8.7 | 34  |
| <b>B</b>      | 36.6 $\pm$ 5.0       | 47.0 | 24.5 | 47  | 39.0 $\pm$ 17.4 | 99.6  | 8.7 | 47  |
| <b>C</b>      | 32.7 $\pm$ 8.0       | 49.8 | 16.4 | 71  | 30.3 $\pm$ 21.4 | 102.7 | 2.8 | 71  |

**Table S2.** Isotopic profiles ( $\delta^{13}\text{C}$  and  $\delta^{15}\text{N}$ ) and C:N ratios in *Syngnathus acus* collected in 2017-2018 in Cíes Archipelago. Recaptured specimens are not included.

|               | $\delta^{13}\text{C}$ (‰) |       |       |     | $\delta^{15}\text{N}$ (‰) |      |      |     | C:N           |     |     |     |
|---------------|---------------------------|-------|-------|-----|---------------------------|------|------|-----|---------------|-----|-----|-----|
|               | Mean $\pm$ sd             | Max   | Min   | n   | Mean $\pm$ sd             | Max  | Min  | n   | Mean $\pm$ sd | Max | Min | n   |
| <b>Total</b>  | -15.4 $\pm$ 0.5           | -13.9 | -16.4 | 148 | 11.1 $\pm$ 0.6            | 12.3 | 9.4  | 148 | 3.0 $\pm$ 0.1 | 3.5 | 2.8 | 148 |
| <b>Period</b> |                           |       |       |     |                           |      |      |     |               |     |     |     |
| <b>2017</b>   | -15.4 $\pm$ 0.5           | -14.5 | -16.4 | 68  | 11.1 $\pm$ 0.5            | 12.3 | 9.9  | 68  | 3.0 $\pm$ 0.1 | 3.5 | 2.9 | 70  |
| <b>2018</b>   | -15.3 $\pm$ 0.5           | -13.9 | -16.4 | 80  | 11.1 $\pm$ 0.6            | 12.3 | 9.4  | 80  | 2.9 $\pm$ 0.0 | 3.0 | 2.8 | 80  |
| <b>Season</b> |                           |       |       |     |                           |      |      |     |               |     |     |     |
| <b>Spring</b> | -15.5 $\pm$ 0.4           | -14.5 | -16.4 | 71  | 11.4 $\pm$ 0.4            | 12.3 | 10.4 | 71  | 2.9 $\pm$ 0.0 | 3.0 | 2.9 | 71  |
| <b>Summer</b> | -15.3 $\pm$ 0.5           | -14.4 | -16.4 | 61  | 10.8 $\pm$ 0.6            | 11.6 | 9.4  | 61  | 3.0 $\pm$ 0.0 | 3.1 | 2.9 | 61  |
| <b>Autumn</b> | -15.0 $\pm$ 0.5           | -13.9 | -16.4 | 61  | 11.0 $\pm$ 0.5            | 11.7 | 9.9  | 61  | 3.0 $\pm$ 0.2 | 3.5 | 2.8 | 61  |
| <b>Site</b>   |                           |       |       |     |                           |      |      |     |               |     |     |     |
| <b>A</b>      | -15.0 $\pm$ 0.5           | -14.5 | -16.4 | 32  | 11.2 $\pm$ 0.5            | 12.1 | 10.1 | 32  | 2.9 $\pm$ 0.0 | 3.0 | 2.9 | 32  |
| <b>B</b>      | -15.3 $\pm$ 0.4           | -13.9 | -16.4 | 48  | 11.2 $\pm$ 0.4            | 12.3 | 10.2 | 48  | 2.9 $\pm$ 0.0 | 3.0 | 2.8 | 48  |
| <b>C</b>      | -15.4 $\pm$ 0.5           | -14.4 | -16.4 | 68  | 11.0 $\pm$ 0.7            | 12.2 | 9.4  | 68  | 3.0 $\pm$ 0.1 | 3.5 | 2.9 | 68  |
